# Supplementary material for: Intranasal Administration of Nanovectorized Docosahexaenoic Acid (DHA) Improves Cognitive Function in Two Complementary Mouse Models of Alzheimer’s Disease
Source: MDPI journal article supplement (doi:10.3390/antiox11050838), 2022-04-25
Supplement: s1 [file s1]

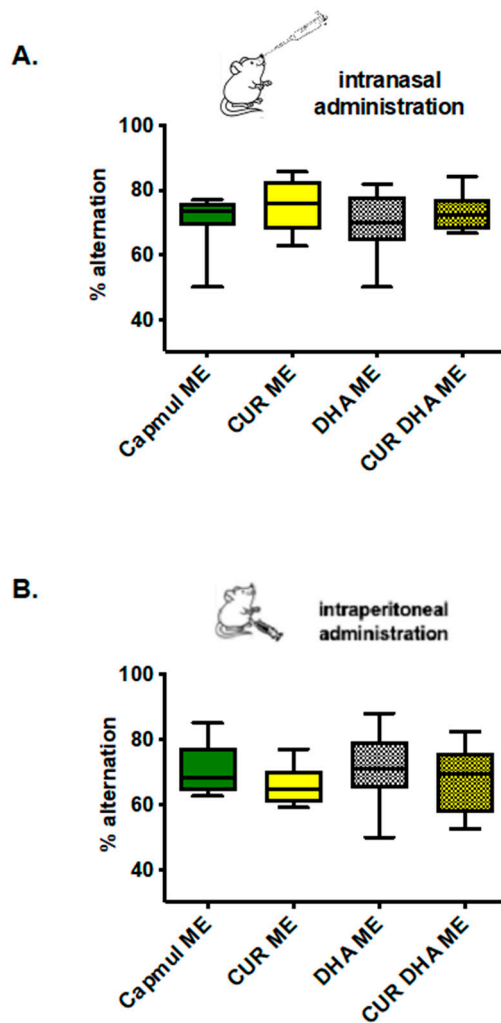

**Suppl. Figure S1:** Effect of intranasal or intraperitoneal administration of CUR, DHA and CURDHA MEs on working memory in scrambled A $\beta_{25-35}$  peptide-injected mice. Effect of intranasal (A) or intraperitoneal (B) administration of MEs on spatial working memory was measured after 4 days of treatment with either Capmul ME (vehicle), CUR-ME, DHA-ME or CURDHA-ME in scrambled A $\beta_{25-35}$  peptide-injected mice. All the results represent the percentage of alternation and are expressed as whiskers (min to max). No significant differences were observed (One-Way ANOVA).

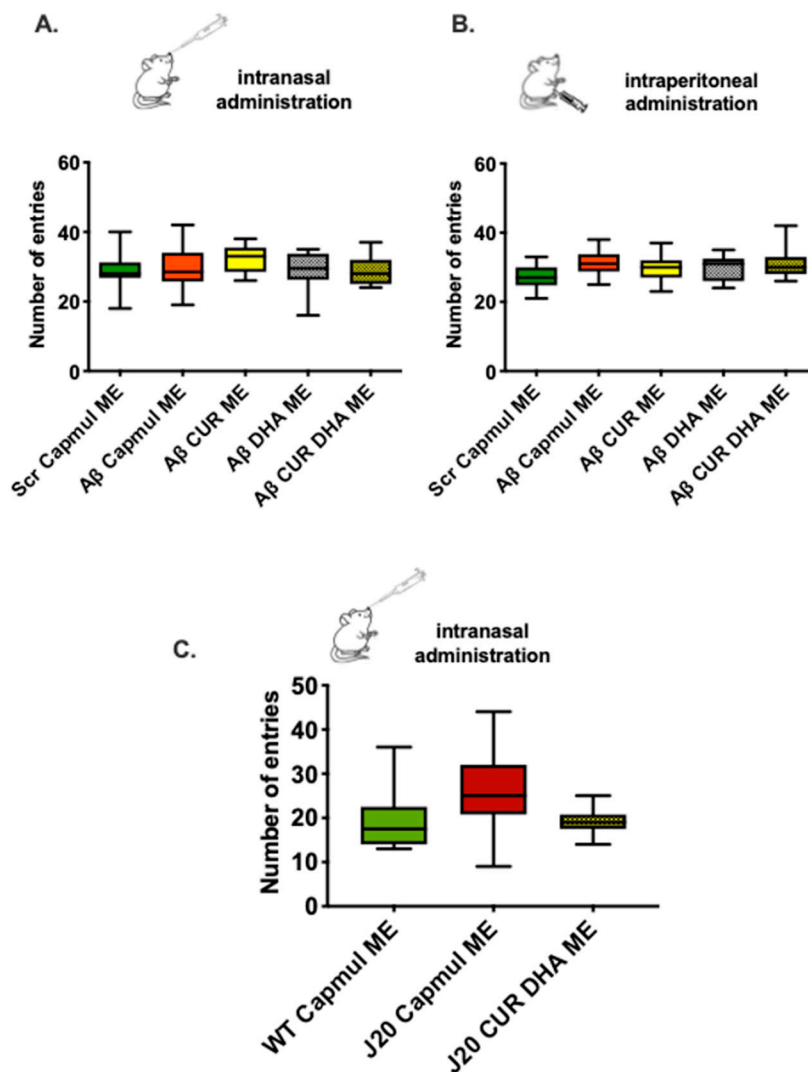

**Suppl. Figure S2:** Effect of intranasal or intraperitoneal administration of CUR, DHA and CURDHA-MEs on locomotion in oA $\beta_{25-35}$ -injected mice and J20 mice. Locomotion (number of entries in the Y-Maze) was assessed 7 days after intracerebroventricular peptide injection in oA $\beta_{25-35}$  injected mice or in 4-months old J20 mice. A & B. Effect of intranasal (A) or intraperitoneal (B) administration of MEs was measured the day after 4 days' treatments in oA $\beta_{25-35}$  injected mice. C. Effect of intranasal administration of MEs was measured after a 4 week-treatment in J20 mice. Capmul ME was used as a vehicle. All the results represent the number of entries and are expressed as whiskers (min to max). No significant differences were observed (One-Way ANOVA).

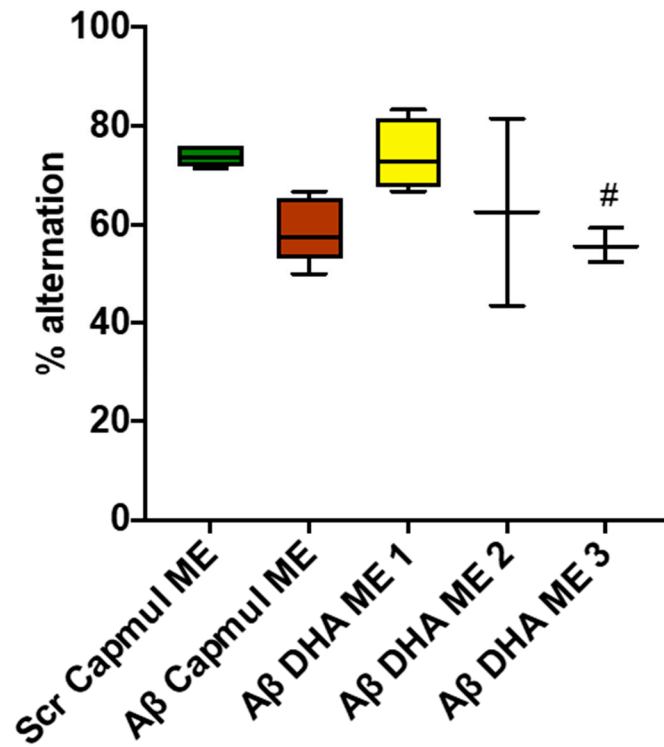

**Suppl. Figure S3:** Effect of intranasal administration of DHA-MEs after different times of storage on working memory in oA $\beta_{25-35}$ -injected mice. Spatial working memory was assessed in the Y-Maze 7 days after intracerebroventricular scrambled (Scr) or oA $\beta_{25-35}$  (A $\beta$ ) peptide injection. Effect of intranasal administration of DHA MEs after different times (1, 2 or 3 months) of storage at 4°C was measured after 4 days of treatment (One-Way ANOVA followed by a Tukey post-hoc test,  $^*p < 0.05$  vs Scr Capmul ME group). Scrambled and A $\beta$ -injected mice received a ME containing Capmul oil as vehicle. All the results represent the percentage of alternation and are expressed as whiskers (min to max).
